# Supplementary material
Source: PubMed Central journal article supplement (PMC1595442)
Supplement: pnas_0605152103_4.pdf [file pnas_0605152103_4.pdf]

**Table 2. *Arabidopsis* genotypes and references (see list below)**

| Genotypes          | Code | Comment on phenotype                                                       | Ecotype background | Primary reference or NASC No. |
|--------------------|------|----------------------------------------------------------------------------|--------------------|-------------------------------|
| Col-0              | Co0  | Wild ecotype: Columbia                                                     | WT                 | N1093                         |
| Col-2              | Co2  | Variant of Columbia                                                        | WT                 | N907                          |
| C24                | C24  | Wild ecotype: C24                                                          | WT                 | N906                          |
| Ak1                | Ak1  | Wild ecotype: Achkarren                                                    | WT                 | N939                          |
| Ler-0              | Le0  | Wild ecotype: Landsberg erecta                                             | WT                 | NW20                          |
| Nd-0               | Nd0  | Wild ecotype: Niederzenz                                                   | WT                 | N1391                         |
| Bch-1              | Bch  | Wild ecotype: Büchen/Lauenburg                                             | WT                 | N957                          |
| Ws-0               | Ws0  | Wild ecotype: Vasljevići                                                   | WT                 | N1603                         |
| <b>Transgenics</b> |      |                                                                            |                    |                               |
| 35S-NahG           | nah  | Constitutive salicylate hydroxylase, defence suppressed                    | Ler                | 1                             |
| CPD2               | C2   | Brassinosteroid synthesis gene antisense                                   | C24                | 2, 3                          |
| CPD9               | C9   | Brassinosteroid synthesis gene antisense                                   | C24                | 2, 3                          |
| CPD31              | C31  | Brassinosteroid synthesis gene antisense                                   | C24                | 2, 3                          |
| <b>Mutants</b>     |      |                                                                            |                    |                               |
| etr1-1             | etr  | Insensitive to ethylene                                                    | Col-1              | 4, 5                          |
| lsd-1              | ls1  | Lesion mimic, spontaneous cell death                                       | Ws                 | 6                             |
| lsd-5              | ls5  | Lesion mimic, spontaneous cell death                                       | Ws                 | 6                             |
| uvr2-1             | uvr  | Sensitive to UV light, mutant type II CPD photolyase                       | Ler                | 7, 8                          |
| vtc1-2             | vtc  | Ascorbic acid deficient, UV sensitive                                      | Col-0              | 9, 10                         |
| fah1-2             | fah  | Defective in ferulate-5-hydroxylase, light sensitive                       | Col-2              | 11, 12                        |
| axr3-1             | axr  | Auxin resistant, transcription factor mutation with pleiotrophic phenotype | Col-1              | 13-15                         |
| eds1               | eds1 | Enhanced disease susceptibility                                            | Ler                | 16                            |
| pgm1-1             | pgm  | Chloroplast phosphoglucomutase deficient, starch deficient                 | Col                | 17, 18                        |
| amt1-1             | a11  | NH <sub>4</sub> transporter defective                                      | Col-0              | 19, 20                        |
| amt1-2             | a12  | NH <sub>4</sub> transporter defective                                      | Col-0              | 20                            |
| amt1-4             | a14  | NH <sub>4</sub> transporter defective                                      | Col-0              | 21                            |
| amt2               | a2   | NH <sub>4</sub> transporter defective                                      | Col-0              | 22, 23                        |

1. Delany, T.P., Uknes, S., Vernooij, B., Friedrich, L., Weymann, K., Negrotto, D., Gaffney, T., Gutrella, M., Kessmann, H., Ward, E & Ryals, J. (1994) *Science* **266**, 1247-1250.
2. Schlüter, U., Köpke, T., Altmann, T. & Müssig, C. (2002) *Plant Cell Environ.* **25**, 783-791.
3. Müssig, C., Fischer, S. & Altmann, T. (2002) *Plant Physiol.* **129**, 1241-1251.
4. Bleecker, A.B., Estelle, M.A., Somerville, C. & Kende, H. (1988) *Science* **241**, 1086-1089.
5. O'Malley, R., Rodriguez, F.I., Esch, J.J., Binder, B.M., O'Donnel, P., Klee, H.J. & Bleecker, A.B. (2005) *Plant J.* **41**, 651-659.
6. Dietrich, R.A., Delaney, T.P., Uknes, S.J., Ward, E.R., Ryals, J.A. & Dangl, J.L. (1994) *Cell* **77**, 565-577.
7. Landry, L.G., Stapleton, A.E., Lim, J., Hoffman, P., Hays, J.B., Walbot, V. & Last, R.L. (1997) *Proc. Natl. Acad. Sci. USA* **94**, 328-332.
8. Britt, A. & Fiscus, E.L. (2003) *Physiol. Plant.* **118**, 183-192.
9. Conklin, P.L., Saracco, S.A., Norris, S.R. & Last, R.L. (2000) *Genetics* **154**, 847-856.
10. Barth, C., Moeder, W., Klessig, D.F. & Conklin, P.L. (2004) *Plant Physiol.* **134**, 1784-1792.
11. Meyer, K., Cusumano, J.C., Somerville, C. & Chapple, C.C.S. (1996) *Proc. Natl. Acad. Sci. USA* **93**, 6869-6874.
12. Hemm, M.R., Ruegger, M.O. & Chapple, C. (2003) *Plant Cell* **15**, 179-194.
13. Leyser, O.H.M., Pickett, F.B., Dharmasiri, S. & Estelle, M. (1996) *Plant J.* **10**, 403-413.
14. Ouellet, F., Overvoorde, P.J. & Theologis, A. (2001) *Plant Cell* **13**, 829-841.
15. Overvoorde, P.J., Okushima, Y., Alonso, J.M., Chan, A., Chang, C., Ecker, J.R., Hughes, B., Liu, A., Onodera, C., Quach, H., Smith, A., Yu, G. & Theologis, A. (2005) *Plant Cell* **17**, 3282-3300.

16. Glazebrook, J., Rogers, E.E. & Frederick, M.A. (1996) *Genetics* **143**, 973-982.
17. Caspar, T., Huber, S.C. & Somerville, C. (1985) *Plant Physiol.* **79**, 11-17.
18. Bläsing, O.E., Gibon, Y., Günther, M., Höhne, M., Morcuende, R., Osuna, D., Thimm, O., Usadel, B., Scheible, W.-R. & Stitt, M. (2005) *Plant Cell* **17**, 3257-3281.
19. Ninnemann, O., Jauniaux, J.C. & Frommer, W.B. (1994) *EMBO J.* **13**, 3464-3471.
20. Gazzarrini, S., Lejay, L., Gojon, A., Ninnemann, O., Frommer, W.B. & von Wirén, N. (1999) *Plant Cell* **11**, 937-947.
21. von Wirén, N., Gazzarrini, S., Gojon, A. & Frommer, W.B. (2000) *Curr. Opin. Plant Biol.* **3**, 254-261.
22. Sohlenkamp, C., Shelden, M., Howitt, S. & Udvardi, M. (2000) *FEBS Lett.* **467**, 273-278.
23. Sohlenkamp, C., Wood, C.C., Roeb, G.W. & Udvardi, M.K. (2002) *Plant Physiol.* **130**, 1788-1796.
