# Supplementary material
Source: PubMed Central journal article supplement (PMC1595442)
Supplement: pnas_0605152103_6.pdf [file pnas_0605152103_6.pdf]

**Table 4. Predicted flow infusion electrospray ionization mass spectrometry (FIE-MS) (+) ion masses for fructans in SST and SST/FFT transgenic potato genotypes (numbers = amu)**

| <u>Metabolite</u>  | <u>Parent ion</u> | <u>Na adduct</u>    | <u>Isotopes</u> | <u>Double Charged</u>    | <u>K adducts</u>    | <u>Isotopes</u> | <u>Double Charged</u>    |
|--------------------|-------------------|---------------------|-----------------|--------------------------|---------------------|-----------------|--------------------------|
| <b>3DPFructan</b>  | <b>504</b>        | <b>527</b><br>(509) | 528<br>529      | <b>263, 264</b><br>(255) | <b>543</b><br>(525) | 544<br>545      | <b>272, 273</b><br>(262) |
| <b>4DP Fructan</b> | <b>666</b>        | <b>689</b><br>(671) | 690<br>691      | <b>344, 345</b><br>(336) | <b>705</b><br>(687) | 706<br>707      | <b>353, 354</b><br>(344) |
| <b>5DPFructan</b>  | <b>828</b>        | <b>851</b><br>(833) | 852<br>853      | <b>425, 426</b><br>(417) | <b>867</b><br>(849) | 868<br>869      | <b>434, 435</b><br>(425) |
| <b>6DP Fructan</b> | <b>990</b>        | [1013]<br>(995)     | [1014]          | <b>506, 507</b><br>(498) | [1029]<br>[1011]    | [1030]          | <b>515, 516</b><br>(506) |
| <b>7DP Fructan</b> | [1152]            | [1175]<br>[1157]    | [1076]          | <b>587, 588</b><br>(579) | [1191]<br>[1173]    | [1192]          | <b>596, 597</b><br>(587) |
| <b>8DP Fructan</b> | [1314]            | [1337]<br>[1319]    | [1338]          | <b>668, 669</b><br>(660) | [1353]<br>[1335]    | [1354]          | <b>677, 678</b><br>(668) |
| <b>9DPFructan</b>  | [1476]            | [1499]<br>[1481]    | [1500]          | <b>749, 750</b><br>(740) | [1515]<br>[1497]    | [1516]          | <b>758, 759</b><br>(748) |

Numbers in bold represent the *m* amu ion identified in the ESI-MS fingerprint; numbers in italics are isotopes; numbers in blue are neutral water losses; numbers in square brackets are above the mass range of the LTC instrument.
