# Supplementary material
Source: PubMed Central journal article supplement (PMC1595442)

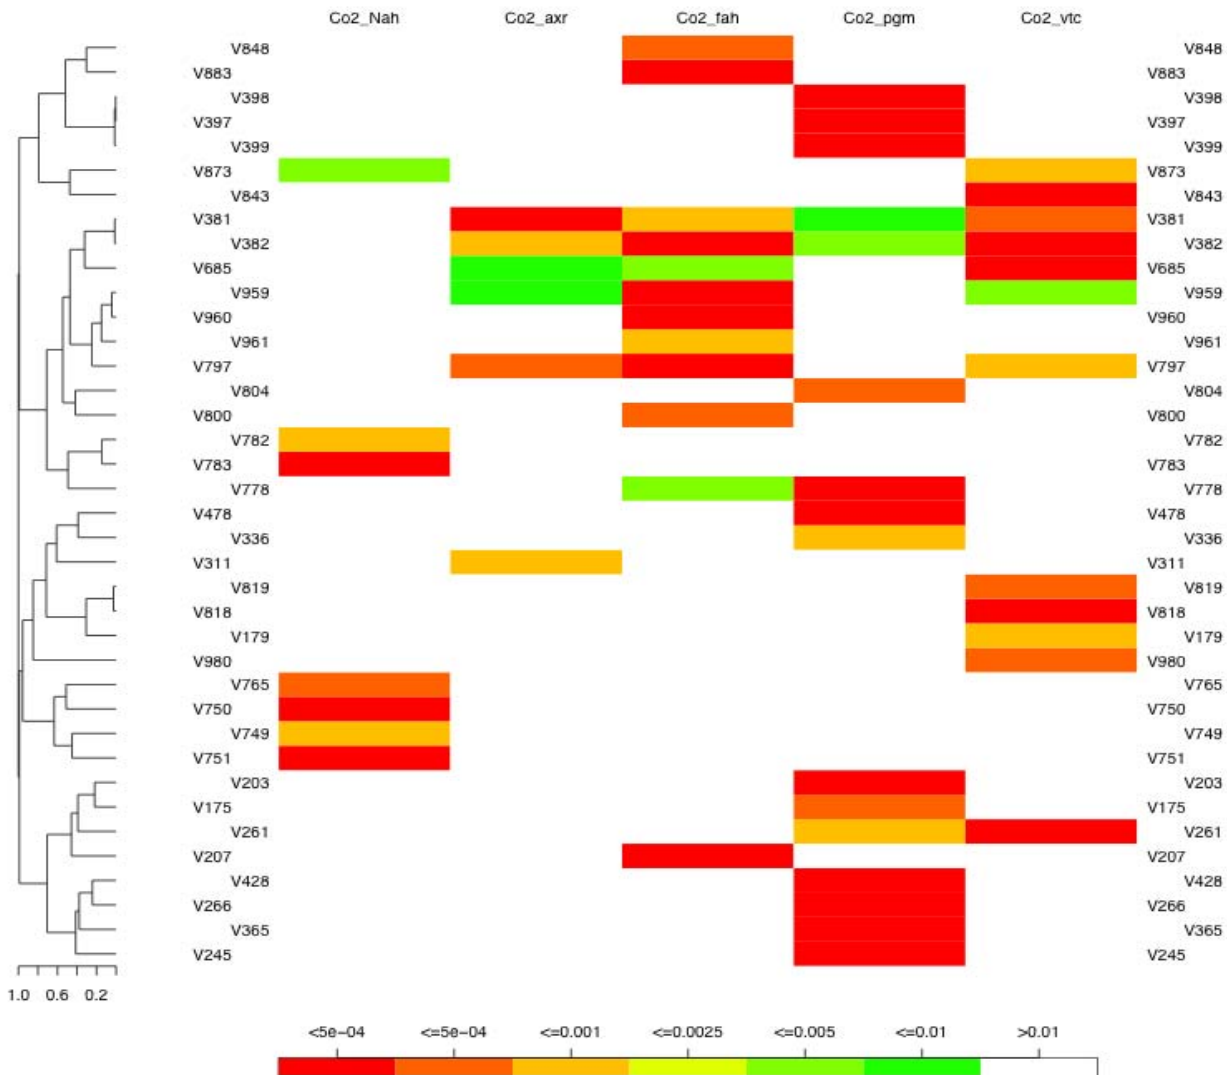

Supplement: pnas_0605152103_2.pdf [file pnas_0605152103_2.pdf]
